# Supplementary material for: CircRNAs as Potential Blood Biomarkers and Key Elements in Regulatory Networks in Gastric Cancer
Source: MDPI journal article supplement (doi:10.3390/ijms23020650), 2022-01-07
Supplement: s1 [file s1]

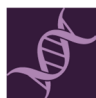

Supplementary materials

# CircRNAs as Potential Blood Biomarkers and Key Elements in Regulatory Networks in Gastric Cancer

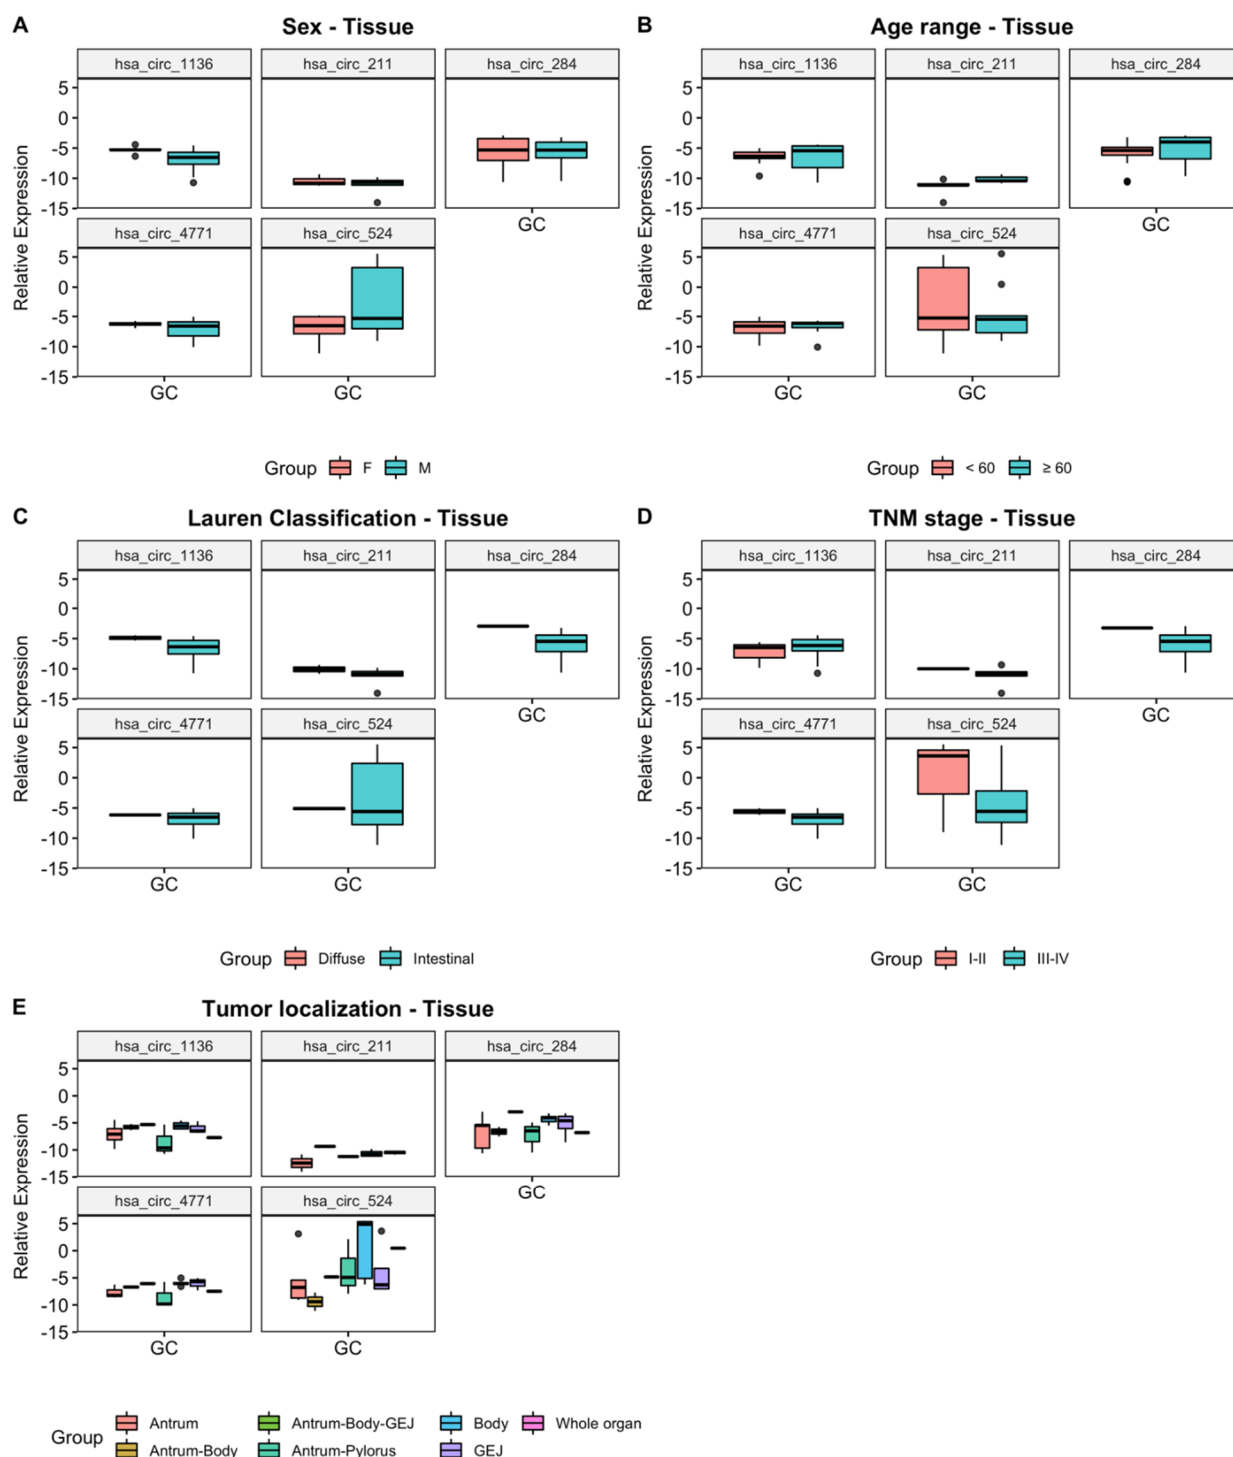

**Figure S1.** Correlation of circRNAs expression in gastric cancer tissue samples with clinicopathological data investigated in patients with gastric adenocarcinoma. GC: gastric cancer.

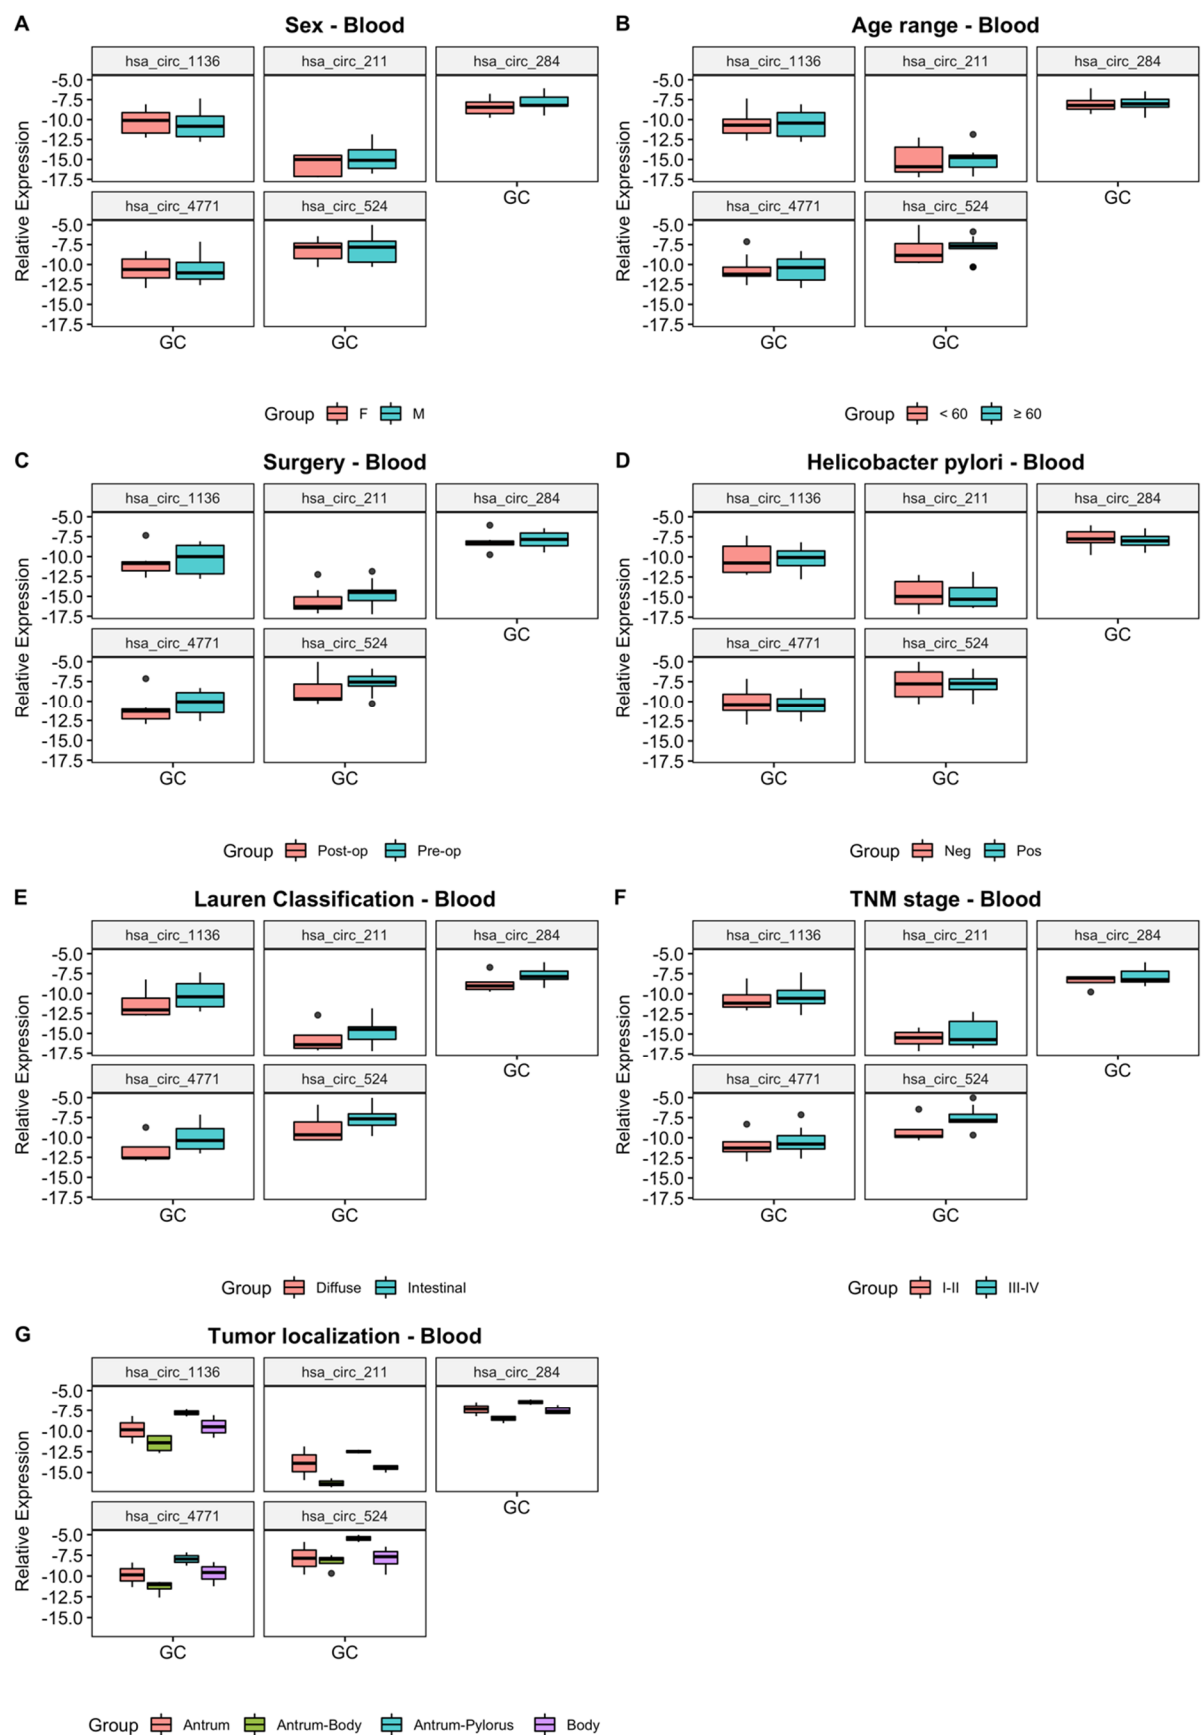

**Figure S2.** Correlation of circRNAs expression in gastric cancer blood samples with clinicopathological data investigated in patients with gastric adenocarcinoma. GC: gastric cancer.

**Table S1.** Expression and accuracy profile (AUC) analysis of circular RNAs in frozen gastric tissue and peripheral blood samples from patients with gastric adenocarcinoma and cancer-free individuals.

| Circular RNAs    | Sample Type | <i>p</i> Values |      |       |                |                                        |               |               |              |               |               |      |
|------------------|-------------|-----------------|------|-------|----------------|----------------------------------------|---------------|---------------|--------------|---------------|---------------|------|
|                  |             | Shapiro-Wilk    |      |       | Kruskal-Wallis | Wilcoxon (tissue) or<br>T-Test (blood) |               |               | Fold Change  |               |               | AUC  |
|                  |             | NC              | GC   | ADJ   |                | GC vs.<br>NC                           | ADJ vs.<br>NC | GC vs.<br>ADJ | GC vs.<br>NC | ADJ vs.<br>NC | GC vs.<br>ADJ |      |
| hsa_circ_0000211 | Tissue      | 0.99            | 0.01 | 0.43  | 0.0003         | 0.001                                  | 0.001         | ns            | 5.23         | 6.55          | -1.25         | 0.86 |
|                  | Blood       | 0.85            | 0.28 | -     | -              | 0.004                                  | -             | -             | 2.96         | -             | -             | 0.77 |
| hsa_circ_0000284 | Tissue      | 0.46            | 0.04 | 0.05  | 0.026          | 0.048                                  | 0.048         | ns            | 2.34         | 2.55          | -1.09         | 0.69 |
|                  | Blood       | 0.36            | 0.67 | -     | -              | $1.3 \times 10^{-5}$                   | -             | -             | 2.84         | -             | -             | 0.90 |
| hsa_circ_0000524 | Tissue      | 0.004           | 0.01 | 0.003 | 0.0002         | 0.0008                                 | 0.001         | ns            | -83.95       | -40.39        | -2.08         | 0.79 |
|                  | Blood       | 0.44            | 0.21 | -     | -              | 0.0073                                 | -             | -             | 2.43         | -             | -             | 0.73 |
| hsa_circ_0001136 | Tissue      | 0.21            | 0.02 | 0.17  | ns             | -                                      | -             | -             | 2.04         | 1.53          | 1.33          | -    |
|                  | Blood       | 0.42            | 0.17 | -     | -              | 0.0005                                 | -             | -             | 3.61         | -             | -             | 0.80 |
| hsa_circ_0004771 | Tissue      | 0.79            | 0.04 | 0.96  | 0.002          | 0.0023                                 | ns            | ns            | 3.19         | 1.73          | 1.84          | 0.73 |
|                  | Blood       | 0.17            | 0.35 | -     | -              | 0.0005                                 | -             | -             | 3.35         | -             | -             | 0.82 |

NC: Non cancer, GC: gastric cancer, ADJ: tumor-adjacent.

**Table S2.** Analyses of clinicopathological data investigated in patients with gastric adenocarcinoma.

| Clinical Features       |                 | Tissue Samples (%) |         | <i>p</i> -Values * |                             |                |                |               | Blood Samples (%) |         | <i>p</i> -Values * |                |               |               |               |
|-------------------------|-----------------|--------------------|---------|--------------------|-----------------------------|----------------|----------------|---------------|-------------------|---------|--------------------|----------------|---------------|---------------|---------------|
| Sex                     | Female          | 6                  | (27.3%) | 0.49 $\Delta$      | 1.0 $\Delta$                | 0.014 $\Delta$ | 0.014 $\Delta$ | 0.14 $\Delta$ | 6                 | (33.3%) | 0.27 $\Delta$      | 0.31 $\Delta$  | 0.74 $\Delta$ | 0.7 $\Delta$  | 0.96 $\Delta$ |
|                         | Male            | 16                 | (72.7%) |                    |                             |                |                |               | 12                | (66.7%) |                    |                |               |               |               |
| Age                     | <60             | 12                 | (54.5%) | 0.08 $\Delta$      | 0.54 $\Delta$               | 0.34 $\Delta$  | 0.9 $\Delta$   | 0.9 $\Delta$  | 8                 | (44.4%) | 0.92 $\Delta$      | 0.95 $\Delta$  | 0.68 $\Delta$ | 1.0 $\Delta$  | 0.98 $\Delta$ |
|                         | $\geq 60$       | 10                 | (45.4%) |                    |                             |                |                |               | 10                | (55.6%) |                    |                |               |               |               |
| Surgery                 | Pre-op          | -                  |         | -                  | -                           | -              | -              | -             | 11                | (61.1%) | 0.27 $\Delta$      | 0.64 $\Delta$  | 0.27 $\Delta$ | 0.53 $\Delta$ | 0.31 $\Delta$ |
|                         | Post-op         | -                  |         |                    |                             |                |                |               | 7                 | (38.9%) |                    |                |               |               |               |
| <i>H. pylori</i>        | Negative        | -                  |         | -                  | -                           | -              | -              | -             | 6                 | (33.3%) | 0.97 $\Delta$      | 0.76 $\Delta$  | 0.92 $\Delta$ | 0.97 $\Delta$ | 0.8 $\Delta$  |
|                         | Positive        | -                  |         |                    |                             |                |                |               | 4                 | (22.2%) |                    |                |               |               |               |
| Lauren's classification | NA **           | 22                 | (100%)  | 0.4 $\Delta$       | $1.4 \times 10^{-5} \Delta$ | 0.21 $\Delta$  | 0.044 $\Delta$ | 0.61 $\Delta$ | 8                 | (44.4%) | 0.43 $\beta$       | 0.2 $\beta$    | 0.44 $\beta$  | 0.52 $\beta$  | 0.28 $\beta$  |
|                         | Intestinal      | 20                 | (90.9%) |                    |                             |                |                |               | 12                | (66.7%) |                    |                |               |               |               |
|                         | Diffuse         | 2                  | (9.1%)  |                    |                             |                |                |               | 5                 | (27.8%) |                    |                |               |               |               |
|                         | Indeterminate   | -                  |         |                    |                             |                |                |               | 1                 | (5.5%)  |                    |                |               |               |               |
|                         | Antrum          | 6                  | (27.3%) |                    |                             |                |                |               | 2                 | (11.1%) |                    |                |               |               |               |
|                         | Antrum-Body     | 2                  | (9.1%)  |                    |                             |                |                |               | 4                 | (22.2%) |                    |                |               |               |               |
| Tumor location          | Antrum-Body-GEJ | 1                  | (4.5%)  | 0.25 $\beta$       | 0.45 $\beta$                | 0.29 $\beta$   | 0.33 $\beta$   | 0.21 $\beta$  | -                 |         | 0.035 $\delta$     | 0.018 $\delta$ | 0.23 $\beta$  | 0.057 $\beta$ | 0.075 $\beta$ |
|                         | Antrum-Pylorus  | 3                  | (13.6%) |                    |                             |                |                |               | 2                 | (11.1%) |                    |                |               |               |               |
|                         | Body            | 5                  | (22.7%) |                    |                             |                |                |               | 4                 | (22.2%) |                    |                |               |               |               |
|                         | GEJ             | 4                  | (18.2%) |                    |                             |                |                |               | -                 |         |                    |                |               |               |               |
|                         | Whole organ     | 1                  | (4.5%)  |                    |                             |                |                |               | -                 |         |                    |                |               |               |               |
|                         | NA **           | -                  |         |                    |                             |                |                |               | 6                 | (33.3%) |                    |                |               |               |               |
| TNM stage               | I-II            | 3                  | (13.6%) | 0.042 $\Delta$     | $6.2 \times 10^{-5} \Delta$ | 0.45 $\Delta$  | 0.56 $\Delta$  | 0.16 $\Delta$ | 4                 | (22.2%) | 0.49 $\Delta$      | 0.34 $\Delta$  | 0.17 $\Delta$ | 0.79 $\Delta$ | 0.65 $\Delta$ |
|                         | III-IV          | 19                 | (86.4%) |                    |                             |                |                |               | 8                 | (44.4%) |                    |                |               |               |               |
|                         | NA **           | -                  |         |                    |                             |                |                |               | 6                 | (33.3%) |                    |                |               |               |               |

\* hsa\_circ\_0000211, hsa\_circ\_0000284, hsa\_circ\_0000524, hsa\_circ\_0001136 and hsa\_circ\_0004771 *p*-values respectively. \*\* Data disregarded in statistical analysis. NA = Not available; GEJ = Gastroesophageal junction.  $\Delta$ : T-test;  $\beta$ : ANOVA;  $\delta$ : TUKEY HSD when comparing "Antrum-Pylorus" vs. "Antrum-Body".

**Table S3.** Potential circRNAs-miRNAs-mRNAs interactions.

| Circular RNA     | Sites | microRNAs       | Target Genes with Strong Evidence                     |               |               |             |
|------------------|-------|-----------------|-------------------------------------------------------|---------------|---------------|-------------|
| hsa_circ_0000211 | 1     | hsa-miR-182-5p  | <i>BCL2</i>                                           | <i>CDKN1A</i> | <i>SMAD4</i>  |             |
| hsa_circ_0000211 | 1     | hsa-miR-188-3p  |                                                       |               |               |             |
| hsa_circ_0000211 | 1     | hsa-miR-198     |                                                       |               |               |             |
| hsa_circ_0000211 | 1     | hsa-miR-224-5p  | <i>BCL2</i>                                           | <i>KRAS</i>   | <i>SMAD4</i>  |             |
| hsa_circ_0000211 | 1     | hsa-miR-582-3p  |                                                       |               |               |             |
| hsa_circ_0000211 | 1     | hsa-miR-587     |                                                       |               |               |             |
| hsa_circ_0000211 | 1     | hsa-miR-622     | <i>KRAS</i>                                           |               |               |             |
| hsa_circ_0000211 | 1     | hsa-miR-626     | <i>SLC7A5</i>                                         |               |               |             |
| hsa_circ_0000211 | 1     | hsa-miR-665     | <i>CD274</i>                                          |               |               |             |
| hsa_circ_0000211 | 1     | hsa-miR-7       | <i>BCL2</i>                                           | <i>SLC7A5</i> |               |             |
| hsa_circ_0000211 | 1     | hsa-miR-885-3p  | <i>CD274</i>                                          |               |               |             |
| hsa_circ_0000211 | 1     | hsa-miR-942     | <i>CDKN1A</i>                                         |               |               |             |
| hsa_circ_0000211 | 1     | hsa-miR-1278    |                                                       |               |               |             |
| hsa_circ_0000211 | 1     | hsa-miR-1290    |                                                       |               |               |             |
| hsa_circ_0000211 | 1     | hsa-miR-1296    |                                                       |               |               |             |
| hsa_circ_0000211 | 1     | hsa-miR-1305    |                                                       |               |               |             |
| hsa_circ_0000284 | 1     | hsa-miR-149     | <i>FGFR1</i>                                          | <i>SP1</i>    |               |             |
| hsa_circ_0000284 | 1     |                 | <i>ACVR2B, ALCAM, BCL2, CAV1, CDC7, CUL5,</i>         |               |               |             |
| hsa_circ_0000284 | 1     |                 | <i>DICER1, DLG5, DTL, ERCC3, ERCC4, HRH1,</i>         |               |               |             |
| hsa_circ_0000284 | 1     | hsa-miR-192     | <i>HOXA10, KIF20B, LMNB2, MAD2L1, MCM10, MIS12,</i>   |               |               |             |
| hsa_circ_0000284 | 1     |                 | <i>PIM1, PRPF38A, RACGAP1, RB1, SEPT10, SMARCB1,</i>  |               |               |             |
| hsa_circ_0000284 | 1     |                 | <i>WNK1</i>                                           |               |               |             |
| hsa_circ_0000284 | 1     | hsa-miR-215     | <i>ACVR2B, ALCAM, CTNNBIP1, RB1, WNK1, ZEB2</i>       |               |               |             |
| hsa_circ_0000284 | 1     | hsa-miR-326     | <i>NOB1, NOTCH1, NOTCH2, PKM, SMO</i>                 |               |               |             |
| hsa_circ_0000284 | 1     | hsa-miR-330-5p  |                                                       |               |               |             |
| hsa_circ_0000284 | 2     | hsa-miR-338-3p  | <i>CCND1</i>                                          | <i>SMO</i>    | <i>UBE2Q1</i> | <i>ZEB2</i> |
| hsa_circ_0000284 | 1     | hsa-miR-346     | <i>GSK3B</i>                                          | <i>LIF</i>    |               |             |
| hsa_circ_0000284 | 1     |                 | <i>BCL2, BCL2L11, CAB39, CASP3, ELAVL4, ERBB2,</i>    |               |               |             |
| hsa_circ_0000284 | 1     |                 | <i>IGF1R, ITGB1, LDHB, LEPROTL1, MTDH, MTPN,</i>      |               |               |             |
| hsa_circ_0000284 | 1     | hsa-miR-375     | <i>PARP1, PHLPP1, RAB10, RHOA, SP1, TIMM8A, USP1,</i> |               |               |             |
| hsa_circ_0000284 | 1     |                 | <i>YWHAZ</i>                                          |               |               |             |
| hsa_circ_0000284 | 1     | hsa-miR-377     | <i>PPM1A</i>                                          | <i>SOD2</i>   |               |             |
| hsa_circ_0000284 | 1     | hsa-miR-382     | <i>PTEN</i>                                           |               |               |             |
| hsa_circ_0000284 | 1     | hsa-miR-485-3p  | <i>MAT1A</i>                                          |               |               |             |
| hsa_circ_0000284 | 1     | hsa-miR-490-5p  | <i>FOS</i>                                            |               |               |             |
| hsa_circ_0000284 | 1     | hsa-miR-495     | <i>MAT1A</i>                                          | <i>PTP4A3</i> | <i>SOX9</i>   |             |
| hsa_circ_0000284 | 1     | hsa-miR-508-3p  |                                                       |               |               |             |
| hsa_circ_0000284 | 1     | hsa-miR-513a-3p |                                                       |               |               |             |
| hsa_circ_0000284 | 1     | hsa-miR-515-5p  |                                                       |               |               |             |
| hsa_circ_0000284 | 1     | hsa-miR-558     |                                                       |               |               |             |
| hsa_circ_0000284 | 1     | hsa-miR-561     |                                                       |               |               |             |
| hsa_circ_0000284 | 1     | hsa-miR-579     |                                                       |               |               |             |
| hsa_circ_0000284 | 1     | hsa-miR-580-3p  | <i>TWIST1</i>                                         |               |               |             |
| hsa_circ_0000284 | 1     | hsa-miR-584     |                                                       |               |               |             |
| hsa_circ_0000284 | 1     | hsa-miR-599     |                                                       |               |               |             |
| hsa_circ_0000284 | 1     | hsa-miR-606     |                                                       |               |               |             |
| hsa_circ_0000284 | 1     | hsa-miR-607     |                                                       |               |               |             |
| hsa_circ_0000284 | 1     | hsa-miR-619     |                                                       |               |               |             |
| hsa_circ_0000284 | 1     | hsa-miR-637     |                                                       |               |               |             |

---

|                  |   |                |       |     |
|------------------|---|----------------|-------|-----|
| hsa_circ_0000284 | 1 | hsa-miR-640    |       |     |
| hsa_circ_0000284 | 2 | hsa-miR-653    |       |     |
| hsa_circ_0000284 | 1 | hsa-miR-668    |       |     |
| hsa_circ_0000284 | 1 | hsa-miR-766    |       |     |
| hsa_circ_0000284 | 1 | hsa-miR-1178   |       |     |
| hsa_circ_0000284 | 1 | hsa-miR-1179   |       |     |
| hsa_circ_0000284 | 2 | hsa-miR-1231   |       |     |
| hsa_circ_0000284 | 1 | hsa-miR-1243   |       |     |
| hsa_circ_0000284 | 1 | hsa-miR-1250   |       |     |
| hsa_circ_0000284 | 1 | hsa-miR-1278   |       |     |
| hsa_circ_0000284 | 1 | hsa-miR-1283   |       |     |
| hsa_circ_0000284 | 1 | hsa-miR-1286   |       |     |
| hsa_circ_0000284 | 1 | hsa-miR-1290   |       |     |
| hsa_circ_0000284 | 1 | hsa-miR-1294   |       |     |
| hsa_circ_0000284 | 2 | hsa-miR-1305   |       |     |
| hsa_circ_0000284 | 1 | hsa-miR-1825   |       |     |
| hsa_circ_0000524 | 1 | hsa-miR-338-3p |       |     |
| hsa_circ_0000524 | 1 | hsa-miR-520g   | VEGFA |     |
| hsa_circ_0000524 | 1 | hsa-miR-520h   | VEGFA |     |
| hsa_circ_0000524 | 1 | hsa-miR-876-3p |       |     |
| hsa_circ_0000524 | 1 | hsa-miR-1178   |       |     |
| hsa_circ_0000524 | 1 | hsa-miR-1208   |       |     |
| hsa_circ_0001136 | 1 | hsa-miR-576-5p |       |     |
| hsa_circ_0001136 | 1 | hsa-miR-616    |       |     |
| hsa_circ_0001136 | 1 | hsa-miR-767-3p | MGMT  |     |
| hsa_circ_0001136 | 1 | hsa-miR-1179   |       |     |
| hsa_circ_0001136 | 1 | hsa-miR-1244   |       |     |
| hsa_circ_0001136 | 1 | hsa-miR-1248   |       |     |
| hsa_circ_0001136 | 1 | hsa-miR-1304   |       |     |
| hsa_circ_0001136 | 1 | hsa-miR-1827   |       |     |
| hsa_circ_0004771 | 1 | hsa-miR-149    | BBC3  | SP1 |
| hsa_circ_0004771 | 1 | hsa-miR-515-5p |       |     |
| hsa_circ_0004771 | 1 | hsa-miR-532-3p |       |     |
| hsa_circ_0004771 | 1 | hsa-miR-562    |       |     |
| hsa_circ_0004771 | 1 | hsa-miR-580-3p |       |     |
| hsa_circ_0004771 | 1 | hsa-miR-589    |       |     |
| hsa_circ_0004771 | 1 | hsa-miR-595    |       |     |
| hsa_circ_0004771 | 1 | hsa-miR-648    |       |     |
| hsa_circ_0004771 | 1 | hsa-miR-653    |       |     |
| hsa_circ_0004771 | 1 | hsa-miR-924    |       |     |
| hsa_circ_0004771 | 1 | hsa-miR-1200   |       |     |
| hsa_circ_0004771 | 1 | hsa-miR-1203   |       |     |
| hsa_circ_0004771 | 1 | hsa-miR-1253   |       |     |

---

**Table S4.** Potential circRNAs-RBPs interactions.

| RBP           | Circular RNA                                                           | Site          |
|---------------|------------------------------------------------------------------------|---------------|
| ACIN1         | hsa_circ_0000211, hsa_circ_0001136                                     | 5, 7          |
| ALYREF        | hsa_circ_0000284, hsa_circ_0001136                                     | 2, 1          |
| BUD13         | hsa_circ_0000284, hsa_circ_0001136                                     | 3, 4          |
| CAPRIN1       | hsa_circ_0000284                                                       | 1             |
| CNBP          | hsa_circ_0000211, hsa_circ_0000284, hsa_circ_0001136                   | 2, 7, 3       |
| CPSF6         | hsa_circ_0000524, hsa_circ_0001136                                     | 2, 1          |
| CSTF2T        | hsa_circ_0000284, hsa_circ_0001136                                     | 1, 1          |
| DDX3X         | hsa_circ_0000284, hsa_circ_0000524, hsa_circ_0001136                   | 3, 4, 2       |
| DDX54         | hsa_circ_0000211, hsa_circ_0000284, hsa_circ_0000524, hsa_circ_0001136 | 2, 20, 3, 6   |
| DGCR8         | hsa_circ_0000524, hsa_circ_0001136                                     | 1, 1          |
| DICER1        | hsa_circ_0000284                                                       | 1             |
| DKC1          | hsa_circ_0000284, hsa_circ_0001136                                     | 1, 1          |
| EIF4A3        | hsa_circ_0000211, hsa_circ_0000284, hsa_circ_0000524, hsa_circ_0001136 | 3, 10, 2, 4   |
| EIF4G2        | hsa_circ_0000524, hsa_circ_0001136                                     | 1, 1          |
| ELAVL1        | hsa_circ_0000284, hsa_circ_0000524, hsa_circ_0001136                   | 3, 2, 2       |
| ELAVL3        | hsa_circ_0000284                                                       | 2             |
| FAM120A       | hsa_circ_0000284                                                       | 6             |
| FBL           | hsa_circ_0000211, hsa_circ_0000284, hsa_circ_0000524, hsa_circ_0001136 | 5, 5, 1, 3    |
| FMR1          | hsa_circ_0000211, hsa_circ_0000284, hsa_circ_0000524, hsa_circ_0001136 | 7, 35, 6, 9   |
| FUS           | hsa_circ_0000211, hsa_circ_0000284, hsa_circ_0000524                   | 1, 6, 1       |
| FXR1          | hsa_circ_0000284, hsa_circ_0000524                                     | 7, 1          |
| FXR2          | hsa_circ_0000284, hsa_circ_0001136                                     | 3, 1          |
| GNL3          | hsa_circ_0000284                                                       | 2             |
| GTF2F1        | hsa_circ_0000524                                                       | 1             |
| HNRNPA1       | hsa_circ_0000284, hsa_circ_0000524                                     | 2, 1          |
| HNRNPA2B<br>1 | hsa_circ_0000284, hsa_circ_0000524, hsa_circ_0001136                   | 2, 4, 1       |
| HNRNPU        | hsa_circ_0000524                                                       | 2             |
| IGF2BP1       | hsa_circ_0000211, hsa_circ_0000284, hsa_circ_0000524, hsa_circ_0001136 | 3, 15, 2, 5   |
| IGF2BP2       | hsa_circ_0000211, hsa_circ_0000284, hsa_circ_0000524, hsa_circ_0001136 | 14, 31, 4, 14 |
| IGF2BP3       | hsa_circ_0000211, hsa_circ_0000284, hsa_circ_0000524, hsa_circ_0001136 | 2, 6, 1, 2    |
| KHDRBS2       | hsa_circ_0000284, hsa_circ_0000524, hsa_circ_0001136                   | 1, 1, 1       |
| LIN28A        | hsa_circ_0000284, hsa_circ_0001136                                     | 3, 1          |
| LIN28         | hsa_circ_0000284, hsa_circ_0000524, hsa_circ_0001136                   | 3, 2, 1       |
| LIN28B        | hsa_circ_0000284, hsa_circ_0000524, hsa_circ_0001136                   | 11, 1, 6      |
| MBNL2         | hsa_circ_0000284                                                       | 1             |
| METTL3        | hsa_circ_0001136                                                       | 1             |

---

|        |                                                                           |                  |
|--------|---------------------------------------------------------------------------|------------------|
| MOV10  | hsa_circ_0000211, hsa_circ_0000284, hsa_circ_0000524,<br>hsa_circ_0001136 | 11, 47, 1,<br>11 |
| MSI2   | hsa_circ_0000211, hsa_circ_0000284                                        | 2, 3             |
| NOP56  | hsa_circ_0001136                                                          | 2                |
| NOP58  | hsa_circ_0000211, hsa_circ_0000284, hsa_circ_0000524,<br>hsa_circ_0001136 | 6, 5, 2, 3       |
| NPM1   | hsa_circ_0000284                                                          | 1                |
| NUMA1  | hsa_circ_0000524                                                          | 2                |
| PRPF8  | hsa_circ_0000211, hsa_circ_0001136                                        | 1, 3             |
| PTBP1  | hsa_circ_0000211, hsa_circ_0000284, hsa_circ_0000524,<br>hsa_circ_0001136 | 1, 3, 4, 2       |
| RBFOX2 | hsa_circ_0000524                                                          | 4                |
| RBM5   | hsa_circ_0000524, hsa_circ_0001136                                        | 1, 1             |
| RBM10  | hsa_circ_0000211, hsa_circ_0000284, hsa_circ_0000524,<br>hsa_circ_0001136 | 7, 3, 4, 4       |
| RBM47  | hsa_circ_0000284, hsa_circ_0001136                                        | 4, 1             |
| SF3B4  | hsa_circ_0001136                                                          | 2                |
| SLTM   | hsa_circ_0000284                                                          | 1                |
| SMNDC1 | hsa_circ_0000284, hsa_circ_0000524, hsa_circ_0001136                      | 1, 1, 2          |
| SND1   | hsa_circ_0000284, hsa_circ_0000524                                        | 2, 2             |
| SRSF1  | hsa_circ_0000211, hsa_circ_0000284, hsa_circ_0000524,<br>hsa_circ_0001136 | 4, 9, 7, 9       |
| SRSF3  | hsa_circ_0000211, hsa_circ_0000284                                        | 1, 4             |
| SRSF7  | hsa_circ_0000284, hsa_circ_0000524, hsa_circ_0001136                      | 2, 1, 2          |
| SRSF9  | hsa_circ_0000284, hsa_circ_0001136                                        | 2, 2             |
| SRSF10 | hsa_circ_0000211, hsa_circ_0000284, hsa_circ_0000524,<br>hsa_circ_0001136 | 1, 1, 1, 1       |
| TAF15  | hsa_circ_0000211, hsa_circ_0000284                                        | 1, 2             |
| TARDBP | hsa_circ_0000284, hsa_circ_0000524, hsa_circ_0001136                      | 1, 2, 1          |
| U2AF1  | hsa_circ_0001136                                                          | 3                |
| U2AF2  | hsa_circ_0000211, hsa_circ_0000284, hsa_circ_0000524,<br>hsa_circ_0001136 | 11, 4, 2, 8      |
| UPF1   | hsa_circ_0000211, hsa_circ_0000284, hsa_circ_0000524,<br>hsa_circ_0001136 | 5, 8, 3, 3       |
| YTHDC1 | hsa_circ_0000284                                                          | 2                |
| YTHDF1 | hsa_circ_0000284                                                          | 1                |
| YWHAG  | hsa_circ_0001136                                                          | 2                |

---

**Table S5.** Primers sequences used for qRT-PCR.

| RNA Circular     | Type                               | Forward Primer                  | Reverse Primer                  | Product Size (pb) |
|------------------|------------------------------------|---------------------------------|---------------------------------|-------------------|
| hsa_circ_0000211 | Spanning junction divergent primer | 5' GGAAGTGTTTAAGCAATCAAAG 3'    | 5' TTCCTCCAACATTTTCAATC 3'      | 220               |
| hsa_circ_0000284 | Divergent primer                   | 5' TATGTTGGTGGATCCTGTTCCGGCA 3' | 5' TGGTGGGTAGACCAAGACTTGTGA 3'  | 146               |
| hsa_circ_0000524 | Spanning junction divergent primer | 5' GGGGAGACAAGCAAATCTGAC 3'     | 5' CCTTTGTTGCTCATCCTCTTCT 3'    | 105               |
| hsa_circ_0001136 | Spanning junction divergent primer | 5' CCTTTTCACGCTCAAGGTATTAG 3'   | 5'CTGCTCATTTTCCTTTAGTCCTTCT 3'  | 102               |
| hsa_circ_0004771 | Divergent primer                   | 5' CAGCCTTCTCAATTTTCTTTCTCAG 3' | 5' GCTGTGTTTCTCCCAAATGTT 3'     | 130               |
| ACTB             | Convergent primer                  | 5' GCTCGTCGTCGACAACGGCTC 3'     | 5' CAAACATGATCTGGGTCATCTTCTC 3' | 487               |
